# Supplementary material for: Plasma 25-hydroxyvitamin D, lung function and risk of chronic obstructive pulmonary disease
Source: HighWire-hosted journal article supplement (doi:10.1136/thoraxjnl-2013-203682), 2013-08-01
Supplement: thoraxjnl-2013-203682supp_table2.pdf [file thoraxjnl-2013-203682supp_table2.pdf]

Table S2. Seasonal variation in 25-hydroxyvitamin D levels according to month.

| <b>Plasma 25-hydroxyvitamin D (nmol/L)</b> |                                    |                 |                 |       |                                                        |                 |                 |      |
|--------------------------------------------|------------------------------------|-----------------|-----------------|-------|--------------------------------------------------------|-----------------|-----------------|------|
| <b>Month</b>                               | <b>Copenhagen City Heart Study</b> |                 |                 |       | <b>Copenhagen General Population Study<sup>a</sup></b> |                 |                 |      |
|                                            | Median                             | 25th percentile | 75th percentile | N     | Median                                                 | 25th percentile | 75th percentile | N    |
| <b>January</b>                             | 33                                 | 20              | 50              | 669   | 37                                                     | 26              | 50              | 754  |
| <b>February</b>                            | 32                                 | 20              | 48              | 987   | 35                                                     | 23              | 47              | 828  |
| <b>March</b>                               | 35                                 | 20              | 54              | 849   | 36                                                     | 23              | 50              | 876  |
| <b>April</b>                               | 35                                 | 21              | 53              | 892   | 41                                                     | 28              | 56              | 836  |
| <b>May</b>                                 | 37                                 | 24              | 52              | 1011  | 39                                                     | 27              | 50              | 445  |
| <b>June</b>                                | 42                                 | 29              | 59              | 910   | –                                                      | –               | –               | –    |
| <b>July</b>                                | 45                                 | 31              | 60              | 790   | 43                                                     | 31              | 55              | 278  |
| <b>August</b>                              | 51                                 | 36              | 69              | 886   | 58                                                     | 45              | 74              | 1012 |
| <b>September</b>                           | 57                                 | 40              | 75              | 975   | 55                                                     | 43              | 70              | 908  |
| <b>October</b>                             | 47                                 | 32              | 63              | 685   | 50                                                     | 38              | 64              | 810  |
| <b>November</b>                            | 39                                 | 24              | 54              | 924   | 46                                                     | 33              | 62              | 1001 |
| <b>December</b>                            | 34                                 | 20              | 49              | 538   | 39                                                     | 28              | 52              | 643  |
| <b>Total</b>                               | 41                                 | 26              | 58              | 10116 | 44                                                     | 30              | 60              | 8391 |

<sup>a</sup>Note that June was not represented in the Copenhagen General Population Study, since samples were only measured from July 2004 to May 2005
